# Supplementary material for: Involvement of FvSet1 in Fumonisin B1 Biosynthesis, Vegetative Growth, Fungal Virulence, and Environmental Stress Responses in Fusarium verticillioides
Source: PubMed Central journal article supplement (PMC5331423; doi:10.3390/toxins9020043), 2017-01-24
Supplement: toxins-09-00043-s001.pdf [file toxins-09-00043-s001.pdf]

# Supplementary Materials: Involvement of FvSet1 in Fumonisin B1 Biosynthesis, Vegetative Growth, Fungal Virulence, and Environmental Stress Responses in *Fusarium verticillioides*

Qin Gu, Hafiz Abdul Samad Tahir, Hao Zhang, Hai Huang, Tiantian Ji, Xiao Sun, Liming Wu, Huijun Wu and Xuewen Gao

Table S1. Primers used in this study.

| Primer     | Sequence (5'-3')                                              | Application                                                                                                                               |
|------------|---------------------------------------------------------------|-------------------------------------------------------------------------------------------------------------------------------------------|
| A1         | CGATGAAGAGGAGGAGTTTGA                                         | A pair of PCR primers for amplification of the upstream sequence of the <i>FgSET1</i> gene for construction of the gene deletion vector   |
| A2         | CAAAATAGGCATTGATGTGTTGACCTCCG<br>GAAATTGGTGGGAGAATGA          |                                                                                                                                           |
| A3         | CTCGTCCGAGGGCAAAGGAATAGAGTAG<br>AATGATTAGGACGATGACGCC         | A pair of PCR primers for amplification of the downstream sequence of the <i>FgSET1</i> gene for construction of the gene deletion vector |
| A4         | ATATCGGGGCTCGGGATT                                            |                                                                                                                                           |
| A5         | AAGCGAGCGTCAACTTCCTTG                                         | A pair of PCR primers for identification of <i>FgSET1</i> deletion mutants                                                                |
| A6         | ATTGATATAACCGAGGCGACC                                         |                                                                                                                                           |
| FvSet1-C-F | CAGATCTTGGCTTTCGTAGGAACCCAATC<br>TTCAATGACTCGCCCGCCA          | A pair of PCR primers to amplify <i>FgSET1</i> fragment used for construction of the FgSet1-C vector                                      |
| FvSet1-C-R | CACCACCCCGGTGAACAGTCTCTCGCCCT<br>TGCTCAC GTTGAGGAAGCCCTGCAGTT |                                                                                                                                           |
| HPH-F      | GGAGGTCAACACATCAATGCCTATT                                     | Amplify <i>HPH</i> sequence                                                                                                               |
| HPH-R      | CTACTCTATTCTTTGCCCT                                           |                                                                                                                                           |
| FvActin-F  | TGCTCCTGAGGCTCTCTTCCA                                         | Quantitative real-time PCR primers for analysis of the reference gene actin expression level                                              |
| FvActin-R  | AAGCAAGAATAGAACCACCGA                                         |                                                                                                                                           |
| FUM1-F     | TGCTGCCCTGTATCACAACCA                                         | Quantitative real-time PCR primers for analysis of <i>FUM1</i> gene expression level                                                      |
| FUM1-R     | AATGTGCGCTTGATCCAGTT                                          |                                                                                                                                           |
| FUM6-F     | TCTCTTGTCTTTGGCTGTCCG                                         | Quantitative real-time PCR primers for analysis of <i>FUM6</i> expression level                                                           |
| FUM6-R     | TCAATTTCTAGCAGCATCGG                                          |                                                                                                                                           |
| FUM7-F     | GCATGGAGAGACAAGTTGCA                                          | Quantitative real-time PCR primers for analysis of <i>FUM7</i> expression level                                                           |
| FUM7-R     | TCTGATGAAACTGGGCTTCGT                                         |                                                                                                                                           |
| FUM21-F    | AGCTTGTCAACCCAGCAGATA                                         | Quantitative real-time PCR primers for analysis of <i>FUM21</i> expression level                                                          |
| FUM21-R    | TCAACTATAGTCCCAGCATCA                                         |                                                                                                                                           |
| FUM10-F    | TTTGGAAACCAATGGCGAT                                           | Quantitative real-time PCR primers for analysis of <i>FUM10</i> expression level                                                          |
| FUM10-R    | TTTCGGCAGGGCTGATTTTT                                          |                                                                                                                                           |
| FUM11-F    | AAGGGGGGAAGATAGGCACT                                          | Quantitative real-time PCR primers for analysis of <i>FUM11</i> expression level                                                          |
| FUM11-R    | ATTACGAGTCTTAGCGAGCGA                                         |                                                                                                                                           |
| FUM13-F    | AAACCATGGGATGGTATCAGG                                         | Quantitative real-time PCR primers for analysis of <i>FUM13</i> expression level                                                          |
| FUM13-R    | TTTCTGCTGAGCCGACATCAT                                         |                                                                                                                                           |
| FUM14-F    | AAGAGGTGCTAAAGACAGCCA                                         | Quantitative real-time PCR primers for analysis of <i>FUM14</i> expression level                                                          |
| FUM14-R    | ACTCAGGAGCTGCCACTGATA                                         |                                                                                                                                           |
| FUM15-F    | TATCGCCCTGGAAAAGCTTG                                          | Quantitative real-time PCR primers for analysis of <i>FUM15</i> expression level                                                          |
| FUM15-R    | TCTGTGGGGTCCATTCAATA                                          |                                                                                                                                           |
| FUM17-F    | CTCACGATATCAGTGACCTTT                                         | Quantitative real-time PCR primers for analysis of <i>FUM17</i> expression level                                                          |
| FUM17-R    | AGCCATATGATGTTGAGGGT                                          |                                                                                                                                           |
| FUM18-F    | TCCTCTCCTGTTCTGACGA                                           | Quantitative real-time PCR primers for analysis of <i>FUM18</i> expression level                                                          |
| FUM18-R    | TTGTAGTTGAGATTGCTGCCA                                         |                                                                                                                                           |
| FUM2-F     | AAGTGCTCGGGGAGCGGGTT                                          | Quantitative real-time PCR primers for analysis of <i>FUM2</i> expression level                                                           |
| FUM2-R     | TCGGGCATAACTCTATATCG                                          |                                                                                                                                           |
| FUM3-F     | ACTGATTTACCGAGGCCAA                                           | Quantitative real-time PCR primers for analysis of <i>FUM3</i> expression level                                                           |
| FUM3-R     | AGCGGACCGGAAGCTTCT                                            |                                                                                                                                           |

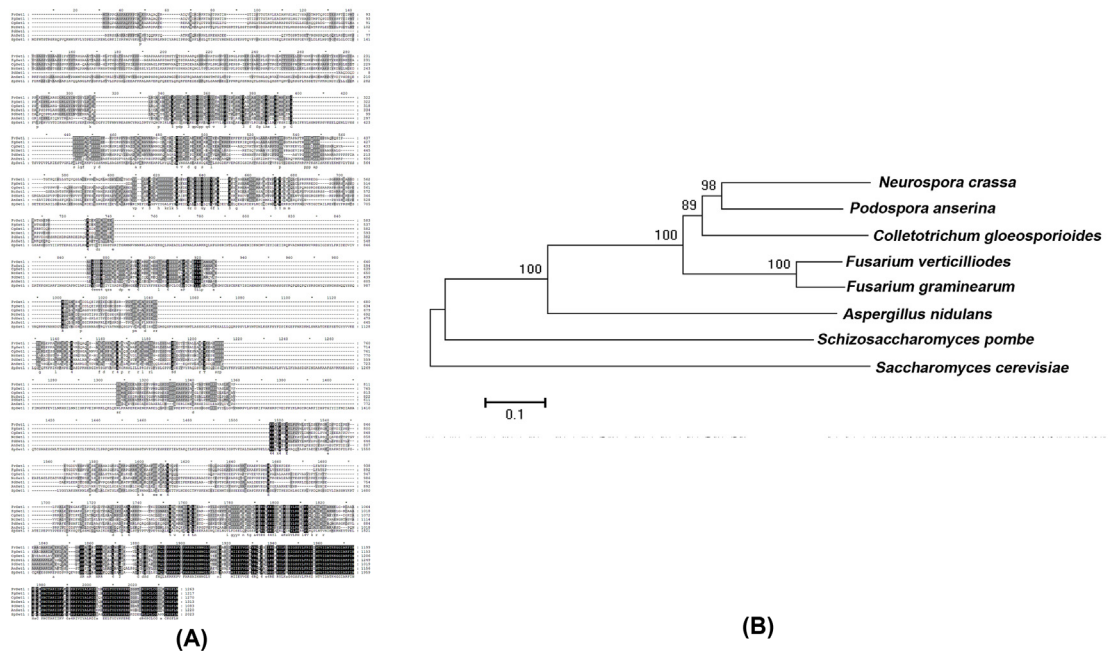

**Figure S1.** FvSet1 is homologous to those counterparts from yeasts and other filamentous fungi. **(A)** alignments of amino acid sequences of Set1 orthologs from *Fusarium verticillioides* (FvSet1), *Saccharomyces cerevisiae* (ScSet1), *Schizosaccharomyces pombe* (SpSet1), *Neurospora crassa* (NcSet1), *Podospira anserina* (PaSet1), *Colletotrichum gloeosporioides* (CgSet1), *Aspergillus nidulans* (AnSet1), and *Fusarium graminearum* (FgSet1). Boxshade program was used to highlight identical (black shading) or similar (grey shading) amino acids; **(B)** phylogenetic tree generated using the neighbour-joining method with Mega 4.1 software (<http://www.megasoftware.net/>) on the basis of the deduced amino acid sequences of FvSet1 from *F. verticillioides* strain 7600 and those from *S. cerevisiae*, *S. pombe*, *N. crassa*, *C. gloeosporioides*, *P. anserina*, *A. nidulans*, and *F. graminearum*. The bootstrap values are indicated on the phylogenetic tree.

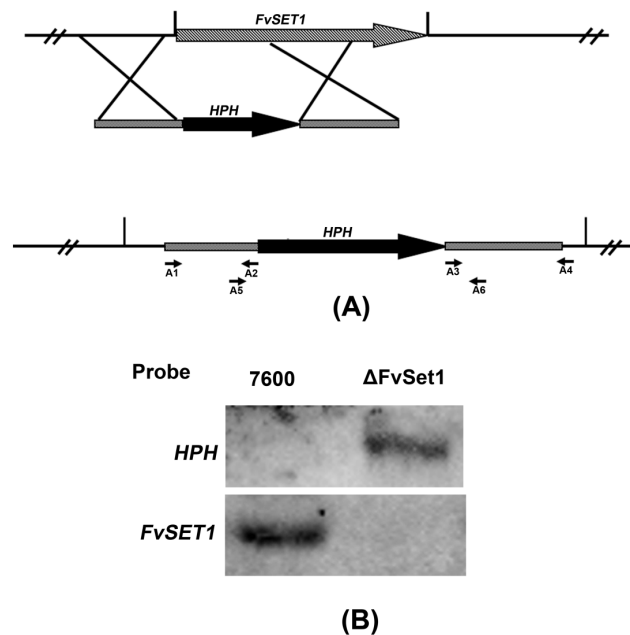

**Figure S2.** Schematic representation of the *FvSET1* disruption strategy and Southern blotting analyses of the deletion mutants. **(A)** Schematic diagram of the *FvSET1* gene, and gene replacement construct; **(B)** Southern blot analysis of *Dra* I-digested genomic DNA of the wild type 7600 and ΔFvSet1 mutant hybridized with the *FvSET1* gene and *HPH* probes, respectively.

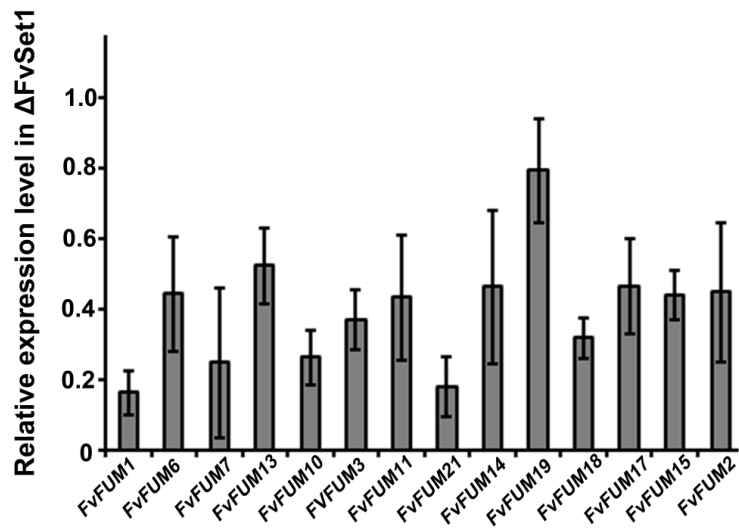

**Figure S3.** Relative expression of *FUM* genes in the  $\Delta FvSet1$ . The relative expression levels of *FUM* genes in  $\Delta FvSet1$  are the relative amounts of mRNA of the gene in the wild-type progenitor. The expression level of the actin gene was used as an internal reference for each sample. Line bars in each column denote standard errors of three repeated experiments.
